# Supplementary material
Source: publisher figshare collection journal article supplement (https://f1000.figshare.com/ndownloader/files/1320528)
Supplement: Supplementary file 1 [file 1320528]

TIME (min)	ABSORB AT 450nm LIPOSOMES-PIPLC plus 1000nM k579
0.00250000	0.314243794
0.00750000	0.314150721
0.01250000	0.315769106
0.01750000	0.316172600
0.02250000	0.316120774
0.02750000	0.317363977
0.03250000	0.317420244
0.03750000	0.317301303
0.04250000	0.318694890
0.04750000	0.318369836
0.05250000	0.318524450
0.05750000	0.319281399
0.06250001	0.319958270
0.06750000	0.319604427
0.07250001	0.321132183
0.07750000	0.320896238
0.08250000	0.320831001
0.08750001	0.322270930
0.09250000	0.322272211
0.09750000	0.322281390
0.10250000	0.323523939
0.10750000	0.323611140
0.11250000	0.323531210
0.11750000	0.325166464
0.12250001	0.324645102
0.12750001	0.324660838
0.13250001	0.326228887
0.13750000	0.326612860
0.14250000	0.326400608
0.14750001	0.326676339
0.15250000	0.328436494
0.15750001	0.327628881
0.16250001	0.328632116
0.16750000	0.329818428
0.17250000	0.328740567
0.17750001	0.329730272
0.18250002	0.331178695
0.18750001	0.330600351
0.19250001	0.330893755
0.19750001	0.331530511
0.20250002	0.331588447
0.20750001	0.332024217
0.21250002	0.332598567
0.21750002	0.332529038
0.22250001	0.333471000
0.22750001	0.333784849
0.23250002	0.333488435
0.23750001	0.334122330
0.24250002	0.334586024
0.24750000	0.334353864
0.25250000	0.334963977
0.25750002	0.335756749
0.26250002	0.335314870
0.26750001	0.336267233
0.27250001	0.337040752
0.27750003	0.336912483
0.28250000	0.336817950
0.28749999	0.338052571
0.29250002	0.337570041
0.29750001	0.337761194
0.30250004	0.339098901
0.30750000	0.339036912
0.31250003	0.338999629
0.31750003	0.339836359
0.32250002	0.340035975
0.32750002	0.339990765
0.33250001	0.341072440
0.33750004	0.341719866
0.34250003	0.341188580
0.34750000	0.341734141
0.35250002	0.342800945
0.35750002	0.341677308
0.36250004	0.342141330
0.36750001	0.342669666
0.37250000	0.342419207
0.37750003	0.342917770
0.38250002	0.343188763
0.38750002	0.342543304
0.39250001	0.343710929
0.39750001	0.343723208
0.40250003	0.343975455
0.40750000	0.344139874
0.41250002	0.344978750
0.41750002	0.344829053
0.42250001	0.345099390
0.42750004	0.345761359
0.43250000	0.345682085
0.43750003	0.346206188
0.44250003	0.346036047
0.44750005	0.345651865
0.45250002	0.346848518
0.45750001	0.346442938
0.46250004	0.346128702
0.46750003	0.346849114
0.47250003	0.347518057
0.47750002	0.347764850
0.48250002	0.347992271
0.48750004	0.348496407
0.49250001	0.348088145
0.49750003	0.348446310
0.50250000	0.349129647
0.50749999	0.348940045
0.51250005	0.349099547
0.51750004	0.349989474
0.52250004	0.349230200
0.52750003	0.350075096
0.53250003	0.350759596
0.53750002	0.350352734
0.54250008	0.350577921
0.54750001	0.350836456
0.55250001	0.350831777
0.55750000	0.350953609
0.56250000	0.351658374
0.56750005	0.351364195
0.57250005	0.351267427
0.57750005	0.351603031
0.58250004	0.351457298
0.58749998	0.351675540
0.59250003	0.352388859
0.59750003	0.352393657
0.60250002	0.352117240
0.60750002	0.353861809
0.61250007	0.353106678
0.61750007	0.352644950
0.62250006	0.353968531
0.62750000	0.353692085
0.63249999	0.353035867
0.63750005	0.354344696
0.64250004	0.353150785
0.64750004	0.353952915
0.65250003	0.354724437
0.65750003	0.354406267
0.66250008	0.353897870
0.66750008	0.354954213
0.67250001	0.354920089
0.67750001	0.354573637
0.68250000	0.355504960
0.68750006	0.355407029
0.69250005	0.354623109
0.69750005	0.355387330
0.70250005	0.355954468
0.70750004	0.355243176
0.71250004	0.356300652
0.71750003	0.355991334
0.72250003	0.355680049
0.72750002	0.356647402
0.73250002	0.356626749
0.73750007	0.356019557
0.74250007	0.357352972
0.74750006	0.356659174
0.75250000	0.356385201
0.75749999	0.357213914
0.76250005	0.357426673
0.76750004	0.356596798
0.77250004	0.357939482
0.77750003	0.357852638
0.78250003	0.357193023
0.78750008	0.357873857
0.79250008	0.357889533
0.79750001	0.357257068
0.80250001	0.358701497
0.80750000	0.358286560
0.81250006	0.357782453
0.81750005	0.358826071
0.82250005	0.359079272
0.82750005	0.358982623
0.83250004	0.359047651
0.83750004	0.359544069
0.84250003	0.358741403
0.84750003	0.359206706
0.85250002	0.359287918
0.85750008	0.359128028
0.86250007	0.359363854
0.86750007	0.359670490
0.87250006	0.359805137
0.87750000	0.359564006
0.88250005	0.360531896
0.88750005	0.359558821
0.89250004	0.359893173
0.89750004	0.360465556
0.90250003	0.360283911
0.90750009	0.360452741
0.91250008	0.360432863
0.91750008	0.361072749
0.92250001	0.360533267
0.92750001	0.361832619
0.93250006	0.361011833
0.93750006	0.360518664
0.94250005	0.361382932
0.94750005	0.361623883
0.95250005	0.361095727
0.95750010	0.362220258
0.96250004	0.361356169
0.96750003	0.361318260
0.97250003	0.361871898
0.97750002	0.362463713
0.98250008	0.361931503
0.98750007	0.362351328
0.99250007	0.362346947
0.99750006	0.362475336
1.00250006	0.362744093
1.00750005	0.362727523
1.01250005	0.362679660
1.01750004	0.363066137
1.02250004	0.363720447
1.02750003	0.362564504
1.03250003	0.362600684
1.03750002	0.363162011
1.04250002	0.362408280
1.04750001	0.363302290
1.05250001	0.362853706
1.05750012	0.362589091
1.06250012	0.362964600
1.06750000	0.363370240
1.07250011	0.363518745
1.07749999	0.363730133
1.08250010	0.364670664
1.08749998	0.363784552
1.09250009	0.363662720
1.09750009	0.364858806
1.10250008	0.363654554
1.10750008	0.363973767
1.11249995	0.365018249
1.11750007	0.364007175
1.12250006	0.364207357
1.12750006	0.364897013
1.13250005	0.364259750
1.13750005	0.364716679
1.14250004	0.365415186
1.14750016	0.364527583
1.15250003	0.364757568
1.15750003	0.365580320
1.16250002	0.364990413
1.16750002	0.365324885
1.17250013	0.365673065
1.17750001	0.364953160
1.18250012	0.365126580
1.18750000	0.365513980
1.19250000	0.365297288
1.19750011	0.365365475
1.20249999	0.366037250
1.20750010	0.365461320
1.21249998	0.365146995
1.21750009	0.366094321
1.22250009	0.365845084
1.22750008	0.365376860
1.23250008	0.366479397
1.23750007	0.366928965
1.24250007	0.365770161
1.24750006	0.366414368
1.25250006	0.365414560
1.25750005	0.365791649
1.26250017	0.366932541
1.26750004	0.366633833
1.27250016	0.366212487
1.27750003	0.366592884
1.28250003	0.366060168
1.28750014	0.366594911
1.29250002	0.366896004
1.29750013	0.366820127
1.30250001	0.366701782
1.30750012	0.367231280
1.31250012	0.367189199
1.31750000	0.366811901
1.32250011	0.366859824
1.32749999	0.368520826
1.33250010	0.367470264
1.33750010	0.367637008
1.34250009	0.367779970
1.34750009	0.367159188
1.35250008	0.367244393
1.35750008	0.368604034
1.36250007	0.367507160
1.36750007	0.367179632
1.37250006	0.367606580
1.37750006	0.367319673
1.38250005	0.367372721
1.38750017	0.368507415
1.39250004	0.367545486
1.39750016	0.367598891
1.40250003	0.368505716
1.40750003	0.368107379
1.41250014	0.368088454
1.41750002	0.368940920
1.42250013	0.368118197
1.42750001	0.368181676
1.43250012	0.368315131
1.43750012	0.368579447
1.44250000	0.368144751
1.44750011	0.368863642
1.45249999	0.368369937
1.45750010	0.368038744
1.46250010	0.368769497
1.46750009	0.368780345
1.47250009	0.368283182
1.47750008	0.368477404
1.48250008	0.369285524
1.48750007	0.368253648
1.49250007	0.368611246
1.49750006	0.369032264
1.50250006	0.368649811
1.50750005	0.369461477
1.51250017	0.368827403
1.51750004	0.368808627
1.52250016	0.368614554
1.52750003	0.369128943
1.53250003	0.368766308
1.53750014	0.369063318
1.54250002	0.369831413
1.54750013	0.369466662
1.55250001	0.369025469
1.55750012	0.369696498
1.56250012	0.369156122
1.56750000	0.369584262
1.57250011	0.370323777
1.57749999	0.369536698
1.58250010	0.369187087
1.58750010	0.370211422
1.59250009	0.368812203
1.59750009	0.369225264
1.60250008	0.370582223
1.60750008	0.369240731
1.61250007	0.369751900
1.61750007	0.370021164
1.62250006	0.370175391
1.62750006	0.369200647
1.63250005	0.370509356
1.63750017	0.369685859
1.64250004	0.369580060
1.64750016	0.370798528
1.65250003	0.369625330
1.65750003	0.369606406
1.66250014	0.370633900
1.66750002	0.369865596
1.67250013	0.369278401
1.67750001	0.370722443
1.68250012	0.370429695
1.68750012	0.369867533
1.69250000	0.370361000
1.69750011	0.370382667
1.70249999	0.370039582
1.70750010	0.370276332
1.71250010	0.370213687
1.71750009	0.369837791
1.72250009	0.370471269
1.72750020	0.371028841
1.73250008	0.369691253
1.73750007	0.371387273
1.74250007	0.370744109
1.74750006	0.370513499
1.75250018	0.371318400
1.75750005	0.370505005
1.76250017	0.370049357
1.76750004	0.370639235
1.77250016	0.370788246
1.77750015	0.370424599
1.78250003	0.371155769
1.78750014	0.370499224
1.79250002	0.370507807
1.79750013	0.370864779
1.80250013	0.371039718
1.80750012	0.370722055
1.81250012	0.371070117
1.81750000	0.371625632
1.82250011	0.371157140
1.82750011	0.371402860
1.83250010	0.371293902
1.83750010	0.370577663
1.84250009	0.371260852
1.84750009	0.371738732
1.85250020	0.370969772
1.85750008	0.371327639
1.86250007	0.371313840
1.86750007	0.371322662
1.87250006	0.371296346
1.87750018	0.371819466
1.88250005	0.371021926
1.88750017	0.370783925
1.89250004	0.371440649
1.89750016	0.370858759
1.90250015	0.371432602
1.90750003	0.371906340
1.91250014	0.371186554
1.91750002	0.370645136
1.92250013	0.371940076
1.92750013	0.371429503
1.93250012	0.371673107
1.93750012	0.372167498
1.94250000	0.371772289
1.94750011	0.370886982
1.95250011	0.371877283
1.95750010	0.371731311
1.96250010	0.371474624
1.96750009	0.372118443
1.97250009	0.371336460
1.97750020	0.371305972
1.98250008	0.372021943
1.98750007	0.371510863
1.99250007	0.371375680
1.99750006	0.372077286
2.00250006	0.372370243
2.00750017	0.371605605
2.01250005	0.371497810
2.01750016	0.371875256
2.02250004	0.371372819
2.02750015	0.372043729
2.03250003	0.371604323
2.03750014	0.371742576
2.04250002	0.371940136
2.04750013	0.372032255
2.05250025	0.371653438
2.05750012	0.371716619
2.06250024	0.372687787
2.06750011	0.371884853
2.07249999	0.372450829
2.07750011	0.371981293
2.08249998	0.371969461
2.08750010	0.372326046
2.09249997	0.372256070
2.09750009	0.371667892
2.10250020	0.372407317
2.10750008	0.372082174
2.11250019	0.371959388
2.11750007	0.372141928
2.12250018	0.372864276
2.12750006	0.371772081
2.13250017	0.372218132
2.13750005	0.372683495
2.14250016	0.371963769
2.14750004	0.372305334
2.15250015	0.372767538
2.15750027	0.372462183
2.16249991	0.372780860
2.16750002	0.372608155
2.17250013	0.372457504
2.17750025	0.372318238
2.18250012	0.372532487
2.18750000	0.372231782
2.19250011	0.372593284
2.19749999	0.373098910
2.20250011	0.371705413
2.20750022	0.372327209
2.21250010	0.372451782
2.21749997	0.372724354
2.22250009	0.372124076
2.22750020	0.372895241
2.23250032	0.372210294
2.23749995	0.372823209
2.24250007	0.373097867
2.24750018	0.372076869
2.25250006	0.372398645
2.25750017	0.372938871
2.26250005	0.372532755
2.26750016	0.371918440
2.27250004	0.372621238
2.27750015	0.372643024
2.28250027	0.372955680
2.28749991	0.373423755
2.29250002	0.372888088
2.29750013	0.373027742
2.30250025	0.373556733
2.30750012	0.372521818
2.31250000	0.372519136
2.31750011	0.372786582
2.32249999	0.372593492
2.32750011	0.371831179
2.33250022	0.373292834
2.33750010	0.373037279
2.34249997	0.372738898
2.34750009	0.373581588
2.35250020	0.372015446
2.35750032	0.372150689
2.36249995	0.373557419
2.36750007	0.372567594
2.37250018	0.372524262
2.37750006	0.373132110
2.38250017	0.373492152
2.38750005	0.372541904
2.39250016	0.373621970
2.39750004	0.373450160
2.40250015	0.372986019
2.40750027	0.373888642
2.41249991	0.373091191
2.41750002	0.372890830
2.42250013	0.373237938
2.42750025	0.373596162
2.43250012	0.372497708
2.43750000	0.373534709
2.44250011	0.373599231
2.44749999	0.372652948
2.45250011	0.373167098
2.45750022	0.373082399
2.46250033	0.372431099
2.46749997	0.372638464
2.47250009	0.373982757
2.47750020	0.372898907
2.48250032	0.373898149
2.48750019	0.374326766
2.49250007	0.373516738
2.49750018	0.372964323
2.50250006	0.373722494
2.50750017	0.373244822
2.51250029	0.373295456
2.51750016	0.374366462
2.52250004	0.373436391
2.52750015	0.373753816
2.53250027	0.373703867
2.53750014	0.372994155
2.54250002	0.372903168
2.54750013	0.374269843
2.55250025	0.373639584
2.55750012	0.374315828
2.56250024	0.374343634
2.56750011	0.373398662
2.57249999	0.373546273
2.57750011	0.375024021
2.58250022	0.373821706
2.58750033	0.373713434
2.59249997	0.373970151
2.59750009	0.373466998
2.60250020	0.373255253
2.60750032	0.374552190
2.61250019	0.373071849
2.61750007	0.373378366
2.62250018	0.373969823
2.62750006	0.373121023
2.63250017	0.373501509
2.63750029	0.373834431
2.64250016	0.373463482
2.64750004	0.373265952
2.65250015	0.373980790
2.65750027	0.374293059
2.66250014	0.373352736
2.66750002	0.373881161
2.67250013	0.373421252
2.67750025	0.373560786
2.68250012	0.374128223
2.68750024	0.373704016
2.69250011	0.373469472
2.69749999	0.373587340
2.70250011	0.373602897
2.70750022	0.374037862
2.71250033	0.374908119
2.71749997	0.374316573
2.72250009	0.373713434
2.72750020	0.374073833
2.73250032	0.374140203
2.73750019	0.373772383
2.74250007	0.374070674
2.74750018	0.373880744
2.75250006	0.373706996
2.75750017	0.374152422
2.76250029	0.373542368
2.76750016	0.373350292
2.77250004	0.374174148
2.77750015	0.374102891
2.78250027	0.373763144
2.78750014	0.373941690
2.79250002	0.373889089
2.79750013	0.373508692
2.80250025	0.373948872
2.80750012	0.374404401
2.81250024	0.373549461
2.81750011	0.373999775
2.82249999	0.374538541
2.82750011	0.373833507
2.83250022	0.373950183
2.83750033	0.375016213
2.84249997	0.373667985
2.84750009	0.374574870
2.85250020	0.374265403
2.85750032	0.373894006
2.86250019	0.374459773
2.86750007	0.374216169
2.87250018	0.374150991
2.87750006	0.374264777
2.88250017	0.374541521
2.88750029	0.373704672
2.89250016	0.374083102
2.89750004	0.374076635
2.90250015	0.373636782
2.90750027	0.374077588
2.91250014	0.374789119
2.91750002	0.373914212
2.92250013	0.373899519
2.92750025	0.374801844
2.93250012	0.373855978
2.93750024	0.373937309
2.94250011	0.374523252
2.94749999	0.373782456
2.95250011	0.373955697
2.95750022	0.374546677
2.96250033	0.374098897
2.96749997	0.373888195
2.97250009	0.374752283
2.97750020	0.374092430
2.98250032	0.374580890
2.98750019	0.374741137
2.99250007	0.374262661
2.99750018	0.374090701
3.00250006	0.374689668
3.00750017	0.373666614
3.01250029	0.373816967
3.01750016	0.374621540
3.02250004	0.373716652
3.02750015	0.374271244
3.03250027	0.374558628
3.03750014	0.373974592
3.04250002	0.373850554
3.04750013	0.374173045
3.05250025	0.374586761
3.05750012	0.373727620
3.06250024	0.374148548
3.06750011	0.375489950
3.07249999	0.373741210
3.07750011	0.375203311
3.08250022	0.374478787
3.08750033	0.374200165
3.09249997	0.374903709
3.09750009	0.374364644
3.10250020	0.373671174
3.10750032	0.374917328
3.11250019	0.374614805
3.11750007	0.374475062
3.12250018	0.375154853
3.12750006	0.374077618
3.13250017	0.374516368
3.13750029	0.374823391
3.14250016	0.374720335
3.14750004	0.374599665
3.15250015	0.374392033
3.15750027	0.374305457
3.16250014	0.374331057
3.16750002	0.374935359
3.17250013	0.374371082
3.17750025	0.374135047
3.18250012	0.374899983
3.18750024	0.375249744
3.19250011	0.373648405
3.19749999	0.374827832
3.20250011	0.374190420
3.20750022	0.374105096
3.21250033	0.374849439
3.21749997	0.375054568
3.22250009	0.374234825
3.22750020	0.374835551
3.23250032	0.374539942
3.23750019	0.374341250
3.24250007	0.374284446
3.24750018	0.374802768
3.25250006	0.374282301
3.25750017	0.375267088
3.26250029	0.375287682
3.26750016	0.374880135
3.27250004	0.374532700
3.27750015	0.375347972
3.28250027	0.374375761
3.28750014	0.374786079
3.29250002	0.374671727
3.29750013	0.374291658
3.30250025	0.374749422
3.30750012	0.375497639
3.31250024	0.374103099
3.31750011	0.374682307
3.32249999	0.374928802
3.32750011	0.374789298
3.33250022	0.374512076
3.33750033	0.375235766
3.34249997	0.374850601
3.34750009	0.374408662
3.35250020	0.375102669
3.35750032	0.374497712
3.36250019	0.374734998
3.36750007	0.375081986
3.37250018	0.374912888
3.37750006	0.374704868
3.38250017	0.375491142
3.38750029	0.374719888
3.39250016	0.374664605
3.39750004	0.375114918
3.40250015	0.375165910
3.40750027	0.374411315
3.41250014	0.375621706
3.41750026	0.375335395
3.42250013	0.374099821
3.42750025	0.375060111
3.43250012	0.375153661
3.43750024	0.374802649
3.44250035	0.376131505
3.44749999	0.374962658
3.45250011	0.374849111
3.45750022	0.375147849
3.46250033	0.374683321
3.46750021	0.374916524
3.47250009	0.375043482
3.47750020	0.374952525
3.48250032	0.374302447
3.48750019	0.374997973
3.49250031	0.375658691
3.49750018	0.374567121
3.50250006	0.374699622
3.50750017	0.375322461
3.51250029	0.374795348
3.51750040	0.374454320
3.52250004	0.375748485
3.52750015	0.374670595
3.53250027	0.375260621
3.53750014	0.375359356
3.54250026	0.374437362
3.54750013	0.375168890
3.55250025	0.375596762
3.55750012	0.375551015
3.56250024	0.374889851
3.56750035	0.375703454
3.57249999	0.374794364
3.57750011	0.375254631
3.58250022	0.375659019
3.58750033	0.374775738
3.59250021	0.375088453
3.59750009	0.375374228
3.60250020	0.374725014
3.60750032	0.374894857
3.61250019	0.375582516
3.61750031	0.374692351
3.62250018	0.374974012
3.62750006	0.375206530
3.63250017	0.374765933
3.63750029	0.375286281
3.64250040	0.375653237
3.64750004	0.374643177
3.65250015	0.374717623
3.65750027	0.375021100
3.66250014	0.374809533
3.66750026	0.374912918
3.67250013	0.375392735
3.67750025	0.374754131
3.68250012	0.374819219
3.68750024	0.375872910
3.69250035	0.374928415
3.69749999	0.374549091
3.70250011	0.375640452
3.70750022	0.375077426
3.71250033	0.375149697
3.71750021	0.375495076
3.72250009	0.375293642
3.72750020	0.374571830
3.73250032	0.375661463
3.73750019	0.375584722
3.74250031	0.375099182
3.74750018	0.375592768
3.75250006	0.375445694
3.75750017	0.375175238
3.76250029	0.375739485
3.76750040	0.375103504
3.77250004	0.374650478
3.77750015	0.375933617
3.78250027	0.375736326
3.78750014	0.374528319
3.79250026	0.374912888
3.79750013	0.375324816
3.80250025	0.374844670
3.80750012	0.375676930
3.81250024	0.375369370
3.81750035	0.375069141
3.82249999	0.375260115
3.82750011	0.375229567
3.83250022	0.375499517
3.83750033	0.375576198
3.84250021	0.376004249
3.84750009	0.374796152
3.85250020	0.375159025
3.85750032	0.375609666
3.86250019	0.375000477
3.86750031	0.374954909
3.87250018	0.375181705
3.87750006	0.375121892
3.88250017	0.375534505
3.88750029	0.376158565
3.89250040	0.375081897
3.89750004	0.375479192
3.90250015	0.375531584
3.90750027	0.375651658
3.91250014	0.375597864
3.91750026	0.376262784
3.92250013	0.375185907
3.92750025	0.375360161
3.93250012	0.376011610
3.93750024	0.374742538
3.94250035	0.375618756
3.94749999	0.375502855
3.95250011	0.375620842
3.95750022	0.375202239
3.96250033	0.375792265
3.96750021	0.375925601
3.97250009	0.375680029
3.97750020	0.376367748
3.98250032	0.375727773
3.98750019	0.375222236
3.99250031	0.376163304
3.99750018	0.375418693
4.00250006	0.375471354
4.00750017	0.376734972
4.01250029	0.375806302
4.01750040	0.375168651
4.02250004	0.376771569
4.02750015	0.376117349
4.03250027	0.375917584
4.03750038	0.376586616
4.04250050	0.375806987
4.04750013	0.375357091
4.05250025	0.375822514
4.05750036	0.375016183
4.06250048	0.374995142
4.06750011	0.376233906
4.07250023	0.375668347
4.07750034	0.375426740
4.08249998	0.375855893
4.08750010	0.375522405
4.09250021	0.375235200
4.09750032	0.375692308
4.10249996	0.376103133
4.10750008	0.375575244
4.11250019	0.376672387
4.11750031	0.376336396
4.12249994	0.375997067
4.12750006	0.375959605
4.13250017	0.376702964
4.13750029	0.375537932
4.14250040	0.375823706
4.14750004	0.375775665
4.15250015	0.375406683
4.15750027	0.376437664
4.16250038	0.376114100
4.16750050	0.375828356
4.17250013	0.376005471
4.17750025	0.376254946
4.18250036	0.375005931
4.18750048	0.375754774
4.19250011	0.375437260
4.19750023	0.375457108
4.20250034	0.375391364
4.20749998	0.376318365
4.21250010	0.375170052
4.21750021	0.375829667
4.22250032	0.376489520
4.22749996	0.375515670
4.23250008	0.375805378
4.23750019	0.376124203
4.24250031	0.375971109
4.24749994	0.376115561
4.25250006	0.376856297
4.25750017	0.375370741
4.26250029	0.375368774
4.26750040	0.376066595
4.27250004	0.375494421
4.27750063	0.376240611
4.28250027	0.376175076
4.28749991	0.375894338
4.29250050	0.376186967
4.29750013	0.376244277
4.30250025	0.375665128
4.30750036	0.375762880
4.31250000	0.375898510
4.31750011	0.375468999
4.32250023	0.375532866
4.32750034	0.376275986
4.33249998	0.375927985
4.33750010	0.375919104
4.34250021	0.376840860
4.34750032	0.376422495
4.35250044	0.375809312
4.35750008	0.376638949
4.36250019	0.376233310
4.36750031	0.375724435
4.37249994	0.376068741
4.37750053	0.375566453
4.38250017	0.375304222
4.38749981	0.376296341
4.39250040	0.376244515
4.39750004	0.375565559
4.40250063	0.375700444
4.40750027	0.375259996
4.41249991	0.375724256
4.41750050	0.376398414
4.42250013	0.375618160
4.42750025	0.375263631
4.43250036	0.376316279
4.43750000	0.375961214
4.44250011	0.375412047
4.44750023	0.376187712
4.45250034	0.375861079
4.45749998	0.375540495
4.46250010	0.375939697
4.46750021	0.376104534
4.47250032	0.375748396
4.47750044	0.376715690
4.48250008	0.375776023
4.48750019	0.375660956
4.49250031	0.376299441
4.49749994	0.376384229
4.50250053	0.375951350
4.50750017	0.376573443
4.51249981	0.376780361
4.51750040	0.375767559
4.52250004	0.375902116
4.52750063	0.376339495
4.53250027	0.375665933
4.53749991	0.375973225
4.54250050	0.376333714
4.54750013	0.375979126
4.55250025	0.376590371
4.55750036	0.376382738
4.56250000	0.375792146
4.56750011	0.375936568
4.57250023	0.376523405
4.57750034	0.375858963
4.58249998	0.375396788
4.58750010	0.376857847
4.59250021	0.375941515
4.59750032	0.375912994
4.60250044	0.376356512
4.60750008	0.375948787
4.61250019	0.375691146
4.61750031	0.376425475
4.62249994	0.375935704
4.62750053	0.376199931
4.63250017	0.376008004
4.63749981	0.376596719
4.64250040	0.376186222
4.64750004	0.376625121
4.65250063	0.376028746
4.65750027	0.376288354
4.66249991	0.376448244
4.66750050	0.376029074
4.67250013	0.375427246
4.67750025	0.376245052
4.68250036	0.375722349
4.68750000	0.376142770
4.69250011	0.376260459
4.69750023	0.376681298
4.70250034	0.376283675
4.70749998	0.376927048
4.71250010	0.376070947
4.71750021	0.376181483
4.72250032	0.376464725
4.72750044	0.375550091
4.73250008	0.375998944
4.73750019	0.376790971
4.74250031	0.375878006
4.74749994	0.376120180
4.75250053	0.376344800
4.75750017	0.376260489
4.76249981	0.375763297
4.76750040	0.376054436
4.77250004	0.376320958
4.77750063	0.376153827
4.78250027	0.376779378
4.78749991	0.376142651
4.79250050	0.375468046
4.79750013	0.376720160
4.80250025	0.376101345
4.80750036	0.375889152
4.81250000	0.376569241
4.81750011	0.376233190
4.82250023	0.376266778
4.82750034	0.376275241
4.83249998	0.376578033
4.83750010	0.376136661
4.84250021	0.376542300
4.84750032	0.376261294
4.85250044	0.375726968
4.85750008	0.376473337
4.86250019	0.376744241
4.86750031	0.376129508
4.87249994	0.376591355
4.87750053	0.377034336
4.88250017	0.375551105
4.88750029	0.376093179
4.89250040	0.376681656
4.89750004	0.375986487
4.90250063	0.376558840
4.90750027	0.376019508
4.91250038	0.375899911
4.91750050	0.376313359
4.92250013	0.376355588
4.92750025	0.376517475
4.93250036	0.376318961
4.93750048	0.376377851
4.94250011	0.375810444
4.94750023	0.376017630
4.95250034	0.376883894
4.95749998	0.376198024
4.96250057	0.376031488
4.96750021	0.377217650
4.97250032	0.376866818
4.97750044	0.376556963
4.98250008	0.377303422
4.98750067	0.375418156
4.99250031	0.376169890
4.99749994	0.376552969
5.00250053	0.376020461
5.00750017	0.375812978
5.01250029	0.376921177
5.01750040	0.376153410
5.02250004	0.376013905
5.02750063	0.376733899
5.03250027	0.375891507
5.03750038	0.375888974
5.04250050	0.377262592
5.04750013	0.376306206
5.05250025	0.376026392
5.05750036	0.376981050
5.06250048	0.375598729
5.06750011	0.375834793
5.07250023	0.377502173
5.07750034	0.376380563
5.08249998	0.375868112
5.08750057	0.376935512
5.09250021	0.376228452
5.09750032	0.375678629
5.10250044	0.377246589
5.10750008	0.376639962
5.11250067	0.376357228
5.11750031	0.376803279
5.12249994	0.376525223
5.12750053	0.375739694
5.13250017	0.377047539
5.13750029	0.376932323
5.14250040	0.376231104
5.14750004	0.376797944
5.15250063	0.376340866
5.15750027	0.376370996
5.16250038	0.376758426
5.16750050	0.376445472
5.17250013	0.376030028
5.17750025	0.376595944
5.18250036	0.376127899
5.18750048	0.376214087
5.19250011	0.376323193
5.19750023	0.376998514
5.20250034	0.376353085
5.20749998	0.377407134
5.21250057	0.376506507
5.21750021	0.375814170
5.22250032	0.376297116
5.22750044	0.377192050
5.23250008	0.376008719
5.23750067	0.376979768
5.24250031	0.377110124
5.24749994	0.376135290
5.25250053	0.377006203
5.25750017	0.377340406
5.26250029	0.376321256
5.26750040	0.376184851
5.27250004	0.376885116
5.27750063	0.376346141
5.28250027	0.376529485
5.28750038	0.376700431
5.29250050	0.375751883
5.29750013	0.377173573
5.30250025	0.376722276
5.30750036	0.376444519
5.31250048	0.375997573
5.31750011	0.376660109
5.32250023	0.376108497
5.32750034	0.376481712
5.33249998	0.376478523
5.33750057	0.376698822
5.34250021	0.376562119
5.34750032	0.377022147
5.35250044	0.376050890
5.35750008	0.376167446
5.36250067	0.376286238
5.36750031	0.375943184
5.37249994	0.376178533
5.37750053	0.377354801
5.38250017	0.376672208
5.38750029	0.376312643
5.39250040	0.376988024
5.39750004	0.376211733
5.40250063	0.376514554
5.40750027	0.376554102
5.41250038	0.376268029
5.41750050	0.376130402
5.42250013	0.377117276
5.42750025	0.376379013
5.43250036	0.375858516
5.43750048	0.377309263
5.44250011	0.375976384
5.44750023	0.376076907
5.45250034	0.376519263
5.45749998	0.376168937
5.46250057	0.376089841
5.46750021	0.376729608
5.47250032	0.376417875
5.47750044	0.376259923
5.48250008	0.376885206
5.48750067	0.376431882
5.49250031	0.375737816
5.49749994	0.377012909
5.50250053	0.376863360
5.50750017	0.376567990
5.51250029	0.376890689
5.51750040	0.377117574
5.52250004	0.376446933
5.52750063	0.377228290
5.53250027	0.376958370
5.53750038	0.376390100
5.54250050	0.376990259
5.54750013	0.376954049
5.55250025	0.376325101
5.55750036	0.376917988
5.56250048	0.376520127
5.56750011	0.376367778
5.57250023	0.376658529
5.57750034	0.376724005
5.58249998	0.376461059
5.58750057	0.376773238
5.59250021	0.376311392
5.59750032	0.376171202
5.60250044	0.377181172
5.60750008	0.377548307
5.61250067	0.376387924
5.61750031	0.377211273
5.62249994	0.377126485
5.62750053	0.376044124
5.63250017	0.376261681
5.63750029	0.377351522
5.64250040	0.376568824
5.64750004	0.376870662
5.65250063	0.377974898
5.65750027	0.376193255
5.66250038	0.376695454
5.66750050	0.377016664
5.67250013	0.376458854
5.67750025	0.377045512
5.68250036	0.377689838
5.68750048	0.376869857
5.69250011	0.376839846
5.69750023	0.377245367
5.70250034	0.376549900
5.70749998	0.376762539
5.71250057	0.377179712
5.71750021	0.376447231
5.72250032	0.376567155
5.72750044	0.376420021
5.73250008	0.376518816
5.73750067	0.376272678
5.74250031	0.377841502
5.74749994	0.376982719
5.75250053	0.376317769
5.75750017	0.377530485
5.76250029	0.376726180
5.76750040	0.376560122
5.77250004	0.377069295
5.77750063	0.376438111
5.78250027	0.376745194
5.78750038	0.377819568
5.79250050	0.376804948
5.79750013	0.376703680
5.80250025	0.377451867
5.80750036	0.376950711
5.81250048	0.376363158
5.81750011	0.377958804
5.82250023	0.376876593
5.82750034	0.376375705
5.83249998	0.377854794
5.83750057	0.376647770
5.84250021	0.376435965
5.84750032	0.377104044
5.85250044	0.376727402
5.85750008	0.376355141
5.86250067	0.377479613
5.86750031	0.377193630
5.87249994	0.376993984
5.87750053	0.377452016
5.88250017	0.376954287
5.88750029	0.376460284
5.89250040	0.377209395
5.89750004	0.376812667
5.90250063	0.376145452
5.90750027	0.377285987
5.91250038	0.376406431
5.91750050	0.375900328
5.92250013	0.377179802
5.92750025	0.376865834
5.93250036	0.376243711
5.93750048	0.377224624
5.94250011	0.376783341
5.94750023	0.376402915
5.95250034	0.376984477
5.95749998	0.376893699
5.96250057	0.376543462
5.96750021	0.377208471
5.97250032	0.377006203
5.97750044	0.376408488
5.98250008	0.377586871
5.98750067	0.376808196
5.99250031	0.376811802
5.99749994	0.377090097
6.00250053	0.376403570
6.00750017	0.376494795
6.01250029	0.377129257
6.01750040	0.377179653
6.02250004	0.376505256
6.02750063	0.376868874
6.03250027	0.376687110
6.03750038	0.376485348
6.04250050	0.377124310
6.04750013	0.377058536
6.05250025	0.376560271
6.05750036	0.376854926
6.06250048	0.377730131
6.06750011	0.376701415
6.07250023	0.376847237
6.07750034	0.377128184
6.08249998	0.376641423
6.08750057	0.376873016
6.09250021	0.377955556
6.09750032	0.377191514
6.10250044	0.376573533
6.10750008	0.377299309
6.11250067	0.376944542
6.11750031	0.376920193
6.12249994	0.377898634
6.12750053	0.376847118
6.13250017	0.377436727
6.13750029	0.377149105
6.14250040	0.377174288
6.14750004	0.377461523
6.15250063	0.377625912
6.15750027	0.376679272
6.16250038	0.377136976
6.16750050	0.376895428
6.17250013	0.376665860
6.17750025	0.376316488
6.18250036	0.377939791
6.18750048	0.376591981
6.19250011	0.376847893
6.19750023	0.377710372
6.20250034	0.376185060
6.20749998	0.376797915
6.21250057	0.376890212
6.21750021	0.377028406
6.22250032	0.376651973
6.22750044	0.377337635
6.23250008	0.378117174
6.23750067	0.377203673
6.24250031	0.378116339
6.24749994	0.377830923
6.25250053	0.377365530
6.25750017	0.377722740
6.26250029	0.376886517
6.26750040	0.376643807
6.27250004	0.377363950
6.27750063	0.377017647
6.28250027	0.376867533
6.28750038	0.377986729
6.29250050	0.377137214
6.29750013	0.377334893
6.30250025	0.377766669
6.30750036	0.377055764
6.31250048	0.376699626
6.31750011	0.377002627
6.32250023	0.376772523
6.32750034	0.376582354
6.33249998	0.377077818
6.33750057	0.377460033
6.34250021	0.376536489
6.34750032	0.377353907
6.35250044	0.377190113
6.35750008	0.376833409
6.36250067	0.377450794
6.36750031	0.377757847
6.37249994	0.377189696
6.37750053	0.377419710
6.38250017	0.377219021
6.38750029	0.376927495
6.39250040	0.377278894
6.39750004	0.376476288
6.40250063	0.376041472
6.40750027	0.377454996
6.41250038	0.377321303
6.41750050	0.376662642
6.42250013	0.377137661
6.42750025	0.376921326
6.43250036	0.376507312
6.43750048	0.377034783
6.44250011	0.377313316
6.44750023	0.376355827
6.45250034	0.376829475
6.45749998	0.377654463
6.46250057	0.376564056
6.46750021	0.377156556
6.47250032	0.377449662
6.47750044	0.376832634
6.48250008	0.377030134
6.48750067	0.377600849
6.49250031	0.376862675
6.49749994	0.376793653
6.50250053	0.376925379
6.50750017	0.376595378
6.51250029	0.376908958
6.51750040	0.376956344
6.52250004	0.376878291
6.52750063	0.376847833
6.53250027	0.377102166
6.53750038	0.376948923
6.54250050	0.376398921
6.54750013	0.377274901
6.55250025	0.376849562
6.55750036	0.377111286
6.56250048	0.377386272
6.56750011	0.377365500
6.57250023	0.376610518
6.57750034	0.377652645
6.58249998	0.376977235
6.58750057	0.376719147
6.59250021	0.377367973
6.59750032	0.376752377
6.60250044	0.376934618
6.60750008	0.377408177
6.61250067	0.376980424
6.61750031	0.376904845
6.62249994	0.377140790
6.62750053	0.377538681
6.63250017	0.376544982
6.63750029	0.377984405
6.64250040	0.376819074
6.64750004	0.376654774
6.65250063	0.378313422
6.65750027	0.377504468
6.66250038	0.376539499
6.66750050	0.377656102
6.67250013	0.376664311
6.67750025	0.377225846
6.68250036	0.377600163
6.68750048	0.376886517
6.69250011	0.376618058
6.69750023	0.377863735
6.70250034	0.377158552
6.70749998	0.376538873
6.71250057	0.376975149
6.71750021	0.376769215
6.72250032	0.376530021
6.72750044	0.377633482
6.73250008	0.377207279
6.73750067	0.377069235
6.74250031	0.377562195
6.74749994	0.377931863
6.75250053	0.376229346
6.75750017	0.377903104
6.76250029	0.376805723
6.76750040	0.376430035
6.77250004	0.377100259
6.77750063	0.376865625
6.78250027	0.376539558
6.78750038	0.377628952
6.79250050	0.377054274
6.79750013	0.376833230
6.80250025	0.377715528
6.80750036	0.377245724
6.81250048	0.376736820
6.81750011	0.377984524
6.82250023	0.377283782
6.82750034	0.376824677
6.83249998	0.377078712
6.83750057	0.376995146
6.84250021	0.376696229
6.84750080	0.377342433
6.85250044	0.377414674
6.85750008	0.377053618
6.86250067	0.377176583
6.86750031	0.377536953
6.87250042	0.376553208
6.87750053	0.376933575
6.88250017	0.378385574
6.88750029	0.377556145
6.89250040	0.377023906
6.89750052	0.377791315
6.90250063	0.377855063
6.90750027	0.377297163
6.91250038	0.378205478
6.91750050	0.376838923
6.92250061	0.377116680
6.92750025	0.377649903
6.93250036	0.376980573
6.93750048	0.377428293
6.94250011	0.377731025
6.94750071	0.376801401
6.95250034	0.376964271
6.95749998	0.378020704
6.96250057	0.377360731
6.96750021	0.377365738
6.97250080	0.377530009
6.97750044	0.376436740
6.98250008	0.377311528
6.98750067	0.377590269
6.99250031	0.377684981
6.99750042	0.376700670
7.00250053	0.377583921
7.00750017	0.377559871
7.01250029	0.377192617
7.01750040	0.377801448
7.02250052	0.377333343
7.02750063	0.376847923
7.03250027	0.378004134
7.03750038	0.377061039
7.04250050	0.377120405
7.04750061	0.377738863
7.05250025	0.377627432
7.05750036	0.377119392
7.06250048	0.377216518
7.06750011	0.376988709
7.07250071	0.377147436
7.07750034	0.377811730
7.08249998	0.377144694
7.08750057	0.376387596
7.09250021	0.377811492
7.09750080	0.378239572
7.10250044	0.377179027
7.10750008	0.377728194
7.11250067	0.377587020
7.11750031	0.376809806
7.12250042	0.377457440
7.12750053	0.377270043
7.13250017	0.376891792
7.13750029	0.377644360
7.14250040	0.377538532
7.14750052	0.376579225
7.15250063	0.377881408
7.15750027	0.377501428
7.16250038	0.377417743
7.16750050	0.377280176
7.17250061	0.377813578
7.17750025	0.376970649
7.18250036	0.378041089
7.18750048	0.377630174
7.19250011	0.376862198
7.19750071	0.377492547
7.20250034	0.378319681
7.20749998	0.376795024
7.21250057	0.377673775
7.21750021	0.377407283
7.22250080	0.377187669
7.22750044	0.377297789
7.23250008	0.377846420
7.23750067	0.377108872
7.24250031	0.377260983
7.24750042	0.377900630
7.25250053	0.376445621
7.25750017	0.376956731
7.26250029	0.378482580
7.26750040	0.377361774
7.27250052	0.376990169
7.27750063	0.377631933
7.28250027	0.377303392
7.28750038	0.377927721
7.29250050	0.378267080
7.29750061	0.376985312
7.30250025	0.377133071
7.30750036	0.377767623
7.31250048	0.377168119
7.31750011	0.377330571
7.32250071	0.377414048
7.32750034	0.377000272
7.33249998	0.377185792
7.33750057	0.377494961
7.34250021	0.377241850
7.34750080	0.377292574
7.35250044	0.377827555
7.35750008	0.377176255
7.36250067	0.377245128
7.36750031	0.377704889
7.37250042	0.377759546
7.37750053	0.377605856
7.38250017	0.377976954
7.38750029	0.377275020
7.39250040	0.377410501
7.39750052	0.377844304
7.40250063	0.377340674
7.40750027	0.376841158
7.41250038	0.377866238
7.41750050	0.378492802
7.42250061	0.377795905
7.42750025	0.378429085
7.43250036	0.377136260
7.43750048	0.376806855
7.44250011	0.377875656
7.44750071	0.377023011
7.45250034	0.377214015
7.45749998	0.377420366
7.46250057	0.377800286
7.46750021	0.377036661
7.47250080	0.378046930
7.47750044	0.377230823
7.48250008	0.377151519
7.48750067	0.378004611
7.49250031	0.377162010
7.49750042	0.377122760
7.50250053	0.377887458
7.50750017	0.378217697
7.51250029	0.377292067
7.51750040	0.377691239
7.52250052	0.377598912
7.52750063	0.377174169
7.53250027	0.377796352
7.53750038	0.378326893
7.54250050	0.377240092
7.54750061	0.378073245
7.55250025	0.378139645
7.55750036	0.376982719
7.56250048	0.377804130
7.56750011	0.378345043
7.57250071	0.377519786
7.57750034	0.377756089
7.58249998	0.378035128
7.58750057	0.377375305
7.59250021	0.377542436
7.59750080	0.377673477
7.60250044	0.377494246
7.60750008	0.377907515
7.61250067	0.377665132
7.61750031	0.376768559
7.62250042	0.377296269
7.62750053	0.378015935
7.63250017	0.377082914
7.63750029	0.377537459
7.64250040	0.377913207
7.64750052	0.377282828
7.65250063	0.377411574
7.65750027	0.378132463
7.66250038	0.377043247
7.66750050	0.377916187
7.67250061	0.377956688
7.67750025	0.377205253
7.68250036	0.377617478
7.68750048	0.378763735
7.69250011	0.377254754
7.69750071	0.377844691
7.70250034	0.377810717
7.70749998	0.377350897
7.71250057	0.377606630
7.71750021	0.378418535
7.72250080	0.377660096
7.72750044	0.377686888
7.73250008	0.378138721
7.73750067	0.377513140
7.74250031	0.377664864
7.74750042	0.377838224
7.75250053	0.377324969
7.75750017	0.377109528
7.76250029	0.378415912
7.76750040	0.376951903
7.77250052	0.377837569
7.77750063	0.377993196
7.78250027	0.377236724
7.78750038	0.377228439
7.79250050	0.378615648
7.79750061	0.378033698
7.80250025	0.377565533
7.80750036	0.378567547
7.81250048	0.377974957
7.81750011	0.377371013
7.82250071	0.377853155
7.82750034	0.377244234
7.83249998	0.377580762
7.83750057	0.377921104
7.84250021	0.377417177
7.84750080	0.377808124
7.85250044	0.378145605
7.85750008	0.377488077
7.86250067	0.376965404
7.86750031	0.378304660
7.87250042	0.377804697
7.87750053	0.377189875
7.88250017	0.378212869
7.88750029	0.377457827
7.89250040	0.377360165
7.89750052	0.378349543
7.90250063	0.377512455
7.90750027	0.377416223
7.91250038	0.377748221
7.91750050	0.377686948
7.92250061	0.377542317
7.92750025	0.378386915
7.93250036	0.378255457
7.93750048	0.377515525
7.94250011	0.377809793
7.94750071	0.377696455
7.95250034	0.377194196
7.95749998	0.378030598
7.96250057	0.378184408
7.96750021	0.377368331
7.97250080	0.378195763
7.97750044	0.378245562
7.98250008	0.376865208
7.98750067	0.377782941
7.99250031	0.377831429
7.99750042	0.377009600
8.00250053	0.377719104
8.00750065	0.378215343
8.01250076	0.377789438
8.01749992	0.377662122
8.02250099	0.378075630
8.02750015	0.377396137
8.03250027	0.378189057
8.03750038	0.378541380
8.04250050	0.377264410
8.04750061	0.378137887
8.05250073	0.377756506
8.05749989	0.377027243
8.06250095	0.377868533
8.06750011	0.378167331
8.07250023	0.377700955
8.07750034	0.377230167
8.08250046	0.378334522
8.08750057	0.377340198
8.09250069	0.377712578
8.09750080	0.378273338
8.10249996	0.377389431
8.10750008	0.377957135
8.11250019	0.378426075
8.11750031	0.378017426
8.12250042	0.378026366
8.12750053	0.378730863
8.13250065	0.377736867
8.13750076	0.377943933
8.14249992	0.379056335
8.14750099	0.378443599
8.15250015	0.378239423
8.15750027	0.378058463
8.16250038	0.377972156
8.16750050	0.378308982
8.17250061	0.378683269
8.17750073	0.377263784
8.18249989	0.377802551
8.18750095	0.378437936
8.19250011	0.377871901
8.19750023	0.378289878
8.20250034	0.378138661
8.20750046	0.377802670
8.21250057	0.377333254
8.21750069	0.378836870
8.22250080	0.378317624
8.22749996	0.377545059
8.23250008	0.378236741
8.23750019	0.377694756
8.24250031	0.377479136
8.24750042	0.378347814
8.25250053	0.378515720
8.25750065	0.377420187
8.26250076	0.379009813
8.26749992	0.377769351
8.27250099	0.377668798
8.27750015	0.379022747
8.28250027	0.378409326
8.28750038	0.377360404
8.29250050	0.378716111
8.29750061	0.377688736
8.30250073	0.377581775
8.30749989	0.378187954
8.31250095	0.377536267
8.31750011	0.377381235
8.32250023	0.378765225
8.32750034	0.378148943
8.33250046	0.377472401
8.33750057	0.378585845
8.34250069	0.378073365
8.34750080	0.377634645
8.35249996	0.378270000
8.35750008	0.378405780
8.36250019	0.377713144
8.36750031	0.378499180
8.37250042	0.377961397
8.37750053	0.377805650
8.38250065	0.378175736
8.38750076	0.378601015
8.39249992	0.377550900
8.39750099	0.378713429
8.40250015	0.378125340
8.40750027	0.377720803
8.41250038	0.377502084
8.41750050	0.378487498
8.42250061	0.377844662
8.42750073	0.378419876
8.43249989	0.378219813
8.43750095	0.377696008
8.44250011	0.378013909
8.44750023	0.377992630
8.45250034	0.377900481
8.45750046	0.378250480
8.46250057	0.378255725
8.46750069	0.377548903
8.47250080	0.377678454
8.47749996	0.378466040
8.48250008	0.377836049
8.48750019	0.378116280
8.49250031	0.378655285
8.49750042	0.377864689
8.50250053	0.378190875
8.50750065	0.378273696
8.51250076	0.377866864
8.51749992	0.377908230
8.52250099	0.378001899
8.52750015	0.377422929
8.53250027	0.378155172
8.53750038	0.377858639
8.54250050	0.377520561
8.54750061	0.378566802
8.55250073	0.378594309
8.55749989	0.377480984
8.56250000	0.377713263
8.56750107	0.378629059
8.57250023	0.377706885
8.57750034	0.378114224
8.58250046	0.378548861
8.58749962	0.378643692
8.59250069	0.378334850
8.59750080	0.378734440
8.60249996	0.378027201
8.60750008	0.377871215
8.61250019	0.378525555
8.61750126	0.377670854
8.62250042	0.377625763
8.62750053	0.379070759
8.63250065	0.378247649
8.63749981	0.377773076
8.64250088	0.377966464
8.64750099	0.378629595
8.65250015	0.377838165
8.65750027	0.378307283
8.66250038	0.377425998
8.66750050	0.377519727
8.67250061	0.378263325
8.67750073	0.377874136
8.68249989	0.377834618
8.68750000	0.378524661
8.69250107	0.377940267
8.69750023	0.377651155
8.70250034	0.378205359
8.70750046	0.377765685
8.71249962	0.378156394
8.71750069	0.379040927
8.72250080	0.377876550
8.72749996	0.377949745
8.73250008	0.378608704
8.73750019	0.378433317
8.74250126	0.378274113
8.74750042	0.378399491
8.75250053	0.378320515
8.75750065	0.377970249
8.76249981	0.378251582
8.76750088	0.378237724
8.77250099	0.378187358
8.77750015	0.378083706
8.78250027	0.377727598
8.78750038	0.377622157
8.79250050	0.378204286
8.79750061	0.378803104
8.80250073	0.377812952
8.80749989	0.378419638
8.81250000	0.378514141
8.81750107	0.378070206
8.82250023	0.378753275
8.82750034	0.378916502
8.83250046	0.378230602
8.83749962	0.378530592
8.84250069	0.378849745
8.84750080	0.378343582
8.85249996	0.377985001
8.85750008	0.378789872
8.86250019	0.378932327
8.86750126	0.379270822
8.87250042	0.379081011
8.87750053	0.377909452
8.88250065	0.378124386
8.88749981	0.378460228
8.89250088	0.378283531
8.89750099	0.378317446
8.90250015	0.378416657
8.90750027	0.377743781
8.91250038	0.377831578
8.91750050	0.378719777
8.92250061	0.378538847
8.92750073	0.378151894
8.93249989	0.378751695
8.93750000	0.378169924
8.94250107	0.377859920
8.94750023	0.378802955
8.95250034	0.378247112
8.95750046	0.378285974
8.96249962	0.379131913
8.96750069	0.378161073
8.97250080	0.377938747
8.97749996	0.378826499
8.98250008	0.378270388
8.98750019	0.377665430
8.99250126	0.378989309
8.99750042	0.378351003
9.00250053	0.377788812
9.00750065	0.379217923
9.01249981	0.378276646
9.01750088	0.378128767
9.02250099	0.379407942
9.02750015	0.378455073
9.03250027	0.377940476
9.03750038	0.379065394
9.04250050	0.378172547
9.04750061	0.378043205
9.05250073	0.378797799
9.05749989	0.378804922
9.06250000	0.377924383
9.06750107	0.378851533
9.07250023	0.378059417
9.07750034	0.377929241
9.08250046	0.379141361
9.08749962	0.378342629
9.09250069	0.377789438
9.09750080	0.378421813
9.10249996	0.378250659
9.10750008	0.378019750
9.11250019	0.379080504
9.11750126	0.378522307
9.12250042	0.377631664
9.12750053	0.378414422
9.13250065	0.378699631
9.13749981	0.378385484
9.14250088	0.378004283
9.14750099	0.378948391
9.15250015	0.378481060
9.15750027	0.379178315
9.16250038	0.378903359
9.16750050	0.378716052
9.17250061	0.378425032
9.17750073	0.378591418
9.18249989	0.378338546
9.18750000	0.379271716
9.19250107	0.378598899
9.19750023	0.378151685
9.20250034	0.378591627
9.20750046	0.379062086
9.21249962	0.378361493
9.21750069	0.378645271
9.22250080	0.378896862
9.22749996	0.378654569
9.23250008	0.378460854
9.23750019	0.379141837
9.24250126	0.378982961
9.24750042	0.378349870
9.25250053	0.378553033
9.25750065	0.378056616
9.26249981	0.378898948
9.26750088	0.378852278
9.27250099	0.378251284
9.27750015	0.378191859
9.28250027	0.379309893
9.28750038	0.378917456
9.29250050	0.378155559
9.29750061	0.379364789
9.30250073	0.378416956
9.30749989	0.378508627
9.31250000	0.378831893
9.31750107	0.378568620
9.32250023	0.378473401
9.32750034	0.378908515
9.33250046	0.379203469
9.33749962	0.378327340
9.34250069	0.379115552
9.34750080	0.378819615
9.35249996	0.378276825
9.35750008	0.378773868
9.36250019	0.378115743
9.36750126	0.378275991
9.37250042	0.379048139
9.37750053	0.379145920
9.38250065	0.377888233
9.38749981	0.378869772
9.39250088	0.379282534
9.39750099	0.379021704
9.40250015	0.378841788
9.40750027	0.379099071
9.41250038	0.378186405
9.41750050	0.378702462
9.42250061	0.379042327
9.42750073	0.378751785
9.43249989	0.378642529
9.43750000	0.379128754
9.44250107	0.378321946
9.44750023	0.378865212
9.45250034	0.378889233
9.45750046	0.378135711
9.46249962	0.378318191
9.46750069	0.379121959
9.47250080	0.378366977
9.47749996	0.378283501
9.48250008	0.379165292
9.48750019	0.378422439
9.49250126	0.378398329
9.49750042	0.378923744
9.50250053	0.378149420
9.50750065	0.378823578
9.51249981	0.379007250
9.51750088	0.378396690
9.52250099	0.378045708
9.52750015	0.380094677
9.53250027	0.378679007
9.53750038	0.378439218
9.54250050	0.379021853
9.54750061	0.378805906
9.55250073	0.378755599
9.55749989	0.379161209
9.56250000	0.378325939
9.56750107	0.378505170
9.57250023	0.379084468
9.57750034	0.378368080
9.58250046	0.378792048
9.58749962	0.379288316
9.59250069	0.378542423
9.59750080	0.378371507
9.60249996	0.379766345
9.60750008	0.378410220
9.61250019	0.377824009
9.61750126	0.379305989
9.62250042	0.378769040
9.62750053	0.378834873
9.63250065	0.379098862
9.63749981	0.378174633
9.64250088	0.378399730
9.64750099	0.379520208
9.65250015	0.378580362
9.65750027	0.378520429
9.66250038	0.378740728
9.66750050	0.378581703
9.67250061	0.378802836
9.67750073	0.379457325
9.68249989	0.379022986
9.68750000	0.377987325
9.69250107	0.379362643
9.69750023	0.378698349
9.70250034	0.378247768
9.70750046	0.378907025
9.71249962	0.379186332
9.71750069	0.378279567
9.72250080	0.379323751
9.72749996	0.379588753
9.73250008	0.378731370
9.73750019	0.378795534
9.74250126	0.378770530
9.74750042	0.377750784
9.75250053	0.379007429
9.75750065	0.379204720
9.76250076	0.378318429
9.76750088	0.379452765
9.77250099	0.379085422
9.77750015	0.378313094
9.78250027	0.378921658
9.78750134	0.378979981
9.79250050	0.378649741
9.79750061	0.378843695
9.80250073	0.379366815
9.80749989	0.378494293
9.81250095	0.378721535
9.81750107	0.379918307
9.82250023	0.378703922
9.82750034	0.378573597
9.83250046	0.379512966
9.83750057	0.378588796
9.84250069	0.378777653
9.84750080	0.379292071
9.85249996	0.378442168
9.85750008	0.378708452
9.86250114	0.380078912
9.86750126	0.378713846
9.87250042	0.378656834
9.87750053	0.379273832
9.88250065	0.378773272
9.88750076	0.378468633
9.89250088	0.379373670
9.89750099	0.378179520
9.90250015	0.379179448
9.90750027	0.378796637
9.91250134	0.378982008
9.91750050	0.378990322
9.92250061	0.379652381
9.92750073	0.378716171
9.93249989	0.379065722
9.93750095	0.379145235
9.94250107	0.378772318
9.94750023	0.378440827
9.95250034	0.379589379
9.95750046	0.379362673
9.96250057	0.378466576
9.96750069	0.380269378
9.97250080	0.378352761
9.97749996	0.378524512
9.98250008	0.379101962
9.98750114	0.378681451
9.99250126	0.378185779
[truncated: 4 more rows]
